# Supplementary material for: Translational Regulation by hnRNP H/F Is Essential for the Proliferation and Survival of Glioblastoma
Source: MDPI journal article supplement (doi:10.3390/cancers14051283), 2022-03-02
Supplement: s1 [file s1]

# Supplementary Material: Translational Regulation by hnRNP H/F Is Essential for the Proliferation and Survival of Glioblastoma

Morgane Le Bras, Noah Gorelick, Sylvain Pautet, Betty Tyler, Stéphane Manenti, Nicolas Skuli, Stefania Millevoi and Anne Cammas

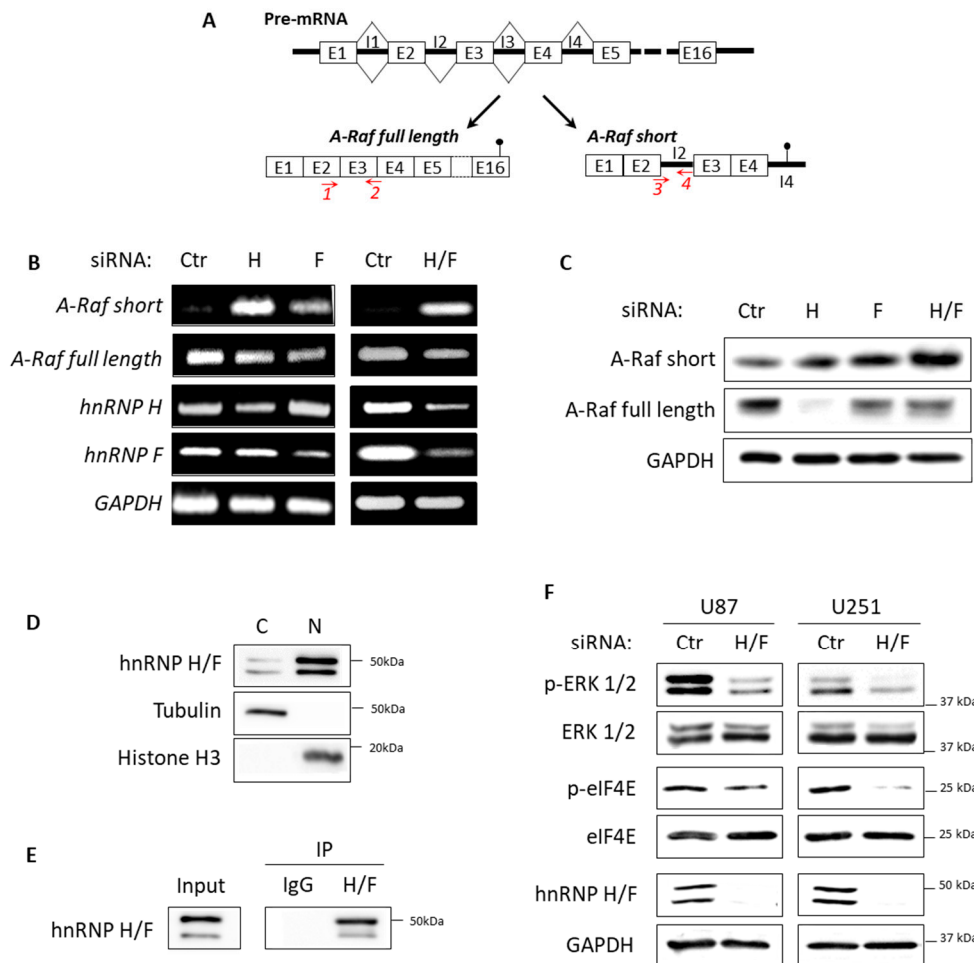

**Figure S1.** hnRNP H/F impact on eIF4E phosphorylation and A-Raf splicing in different GBM cells. **(A)** Diagram of *A-Raf* pre-mRNA alternative splicing generating the dominant-negative *A-Raf short* isoform (detected with the primer pair 3-4 represented by red arrows) or the *A-Raf full length* (detected with the primer pair 1-2 represented by red arrows). Introns are represented with black lines (I), exons with empty boxes (E) and stop codons with black circles. **(B)** RT-PCR using specific primers for *A-Raf short* isoform on total RNA extracted from LN18 cells treated with 2.5 nM of siRNA control (siCtr), siRNAs against hnRNP H and/or hnRNP F (siH, siF or siH/F) for 72 h. Shown is a representative result from  $n = 3$  independent experiments. **(C)** Western blot analysis of A-Raf short and A-Raf full length protein levels in LN18 cells treated with 2.5 nM of siRNA control (siCtr), siRNAs against hnRNP H and hnRNP F (siH/F) for 72 h. **(D)** Subcellular fractionation of U87 cell line, followed by western blot analysis of hnRNP H/F, tubulin (cytosolic marker) and histone H3 (nuclear marker). Nuclear (N) and cytosolic fractions (C). Shown is a representative result from  $n = 3$  independent experiments. **(E)** IP of RNA-protein complexes in nuclear extracts from U87 cells with the hnRNP H/F antibody, followed by western blot analysis. Shown is a representative result from  $n=3$  independent experiments. **(F)** Western blot analysis of phospho-ERK 1/2 (p-ERK 1/2), ERK 1/2, phospho-eIF4E (p-eIF4E) and eIF4E expression in U87 and U251 cells treated with 2.5 nM of siRNA control (siCtr), siRNAs against hnRNP H and hnRNP F (siH/F) for 72 h.

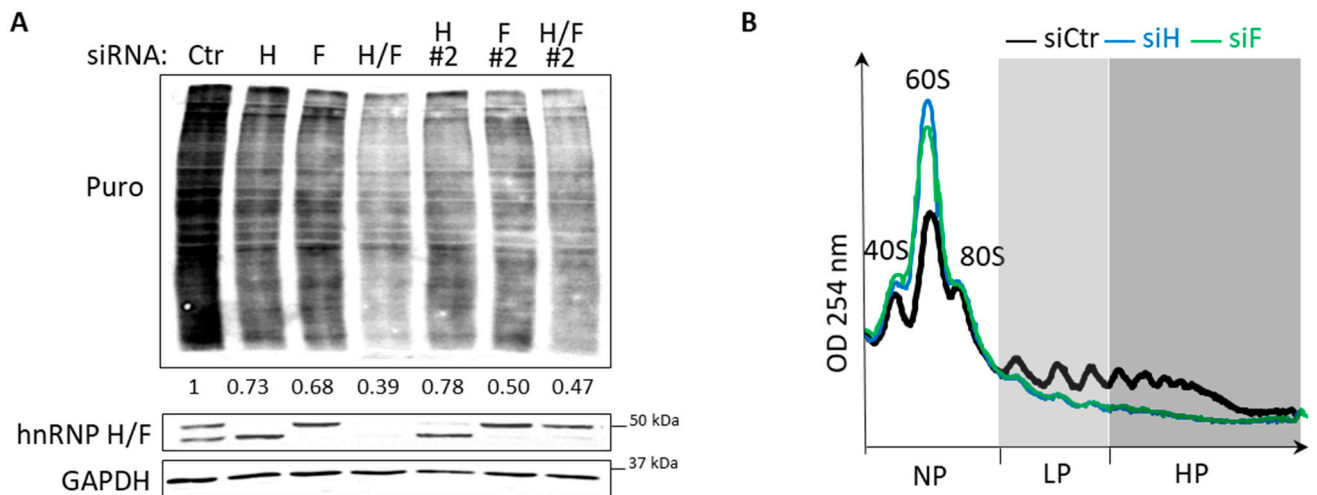

**Figure S2.** hnRNP H/F effect on translation is confirmed using two gene specific siRNAs on SUNSET assay and polysome profiling experiment. **(A)** *De novo* protein synthesis analysis by SUNSET assay in LN18 cells treated with 2.5 nM siRNA control (siCtr), and 2 different siRNAs against hnRNP H and/or hnRNP F (siH, siF, siH/F, siH#2, siF#2, siH/F#2) for 72 h, followed by western blot analysis of the incorporated puromycin, hnRNP H/F and GAPDH. Puromycin levels were normalized to GAPDH protein level and to the siCtr condition. Quantification of the puromycin signal is indicated at the bottom of the gel. Shown is a representative result from  $n = 3$  independent experiments. **(B)** Polysome profile of LN18 cells treated with 2.5 nM siRNA control (siCtr) and siRNAs against hnRNP H or hnRNP F (siH, siF) for 72 h. The positions of the 40S, 60S and 80S ribosomal subunits and non- (NP), light (LP) and heavy (HP) polysomal fractions are indicated.

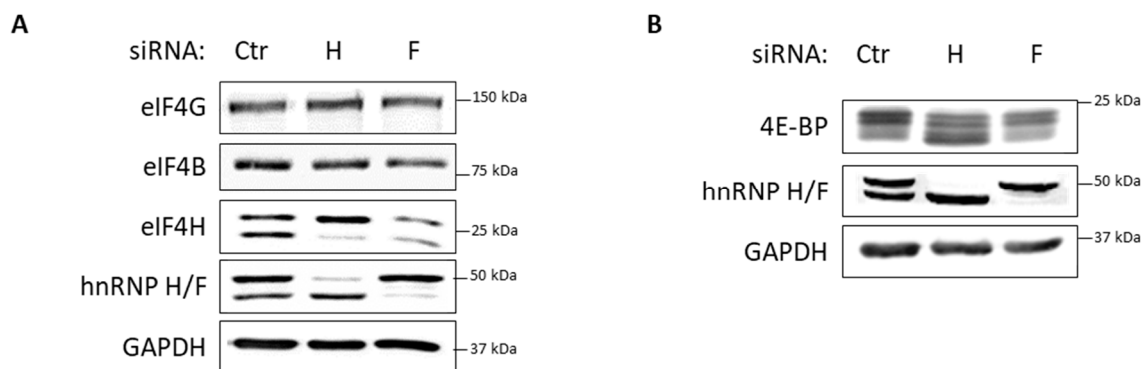

**Figure S3.** hnRNP H/F knockdown controls eIF4H isoform expression and 4E-BP phosphorylation in GBM cells. **(A, B)** Western Blot analysis of **(A)** eIF4G, eIF4B, eIF4H and **(B)** 4E-BP expression in LN18 cells treated with 2.5 nM of siRNA control (siCtr), siRNAs against hnRNP H and hnRNP F (siH and siF) for 72 h. Shown is a representative result from  $n = 3$  independent experiments.

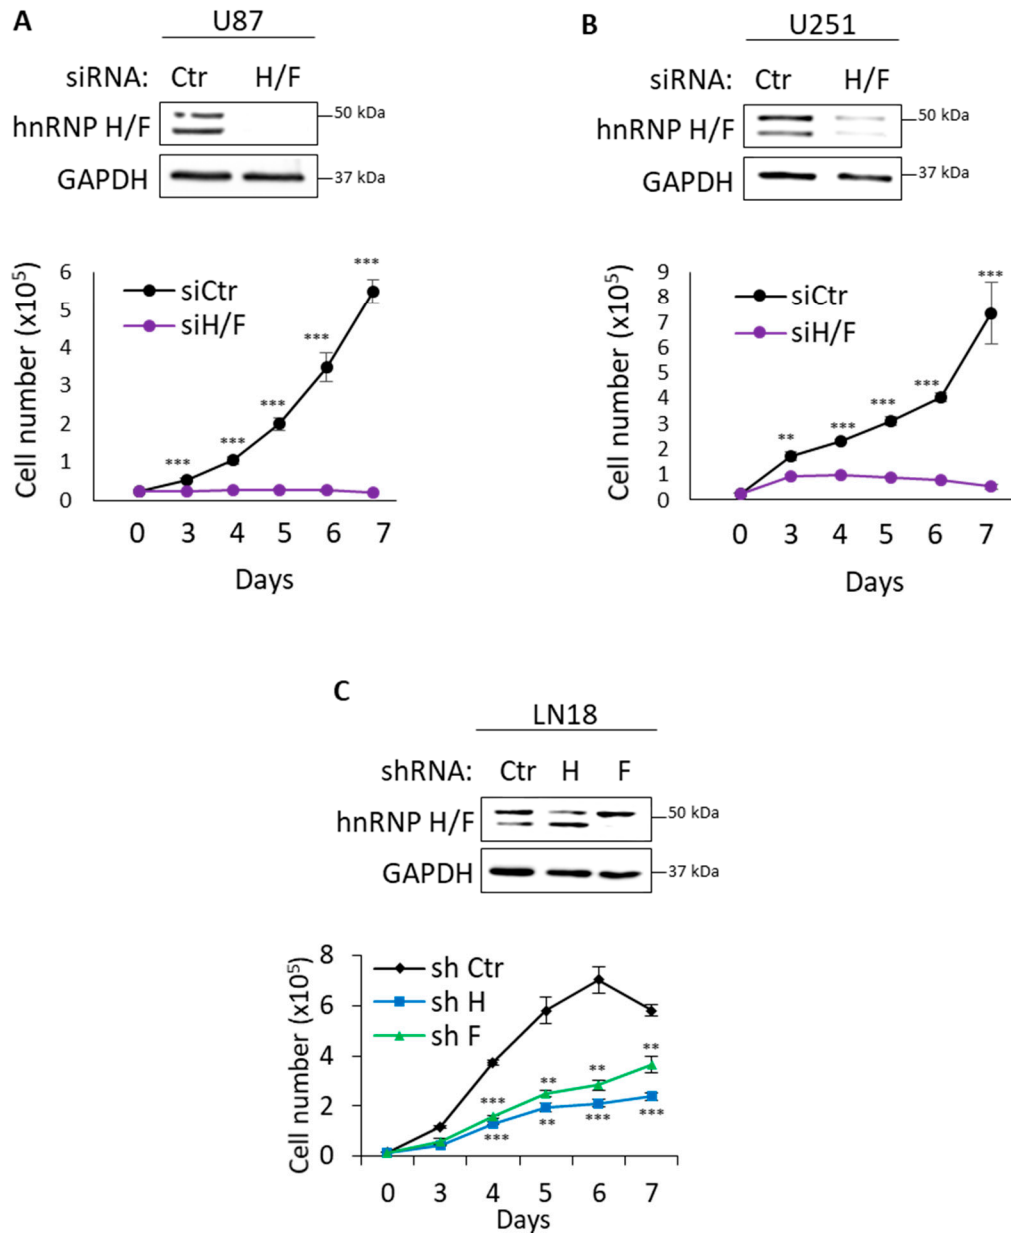

**Figure S4.** hnRNP H/F knockdown inhibits proliferation in different GBM cells. (A, B, C) Proliferation assay and western blot analysis of (A) U87, (B) U251 or (C) LN18 cells treated with 2.5 nM of siRNA control (siCtr), siRNAs against hnRNP H and hnRNP F (siH/F) for 72 h, or shRNAs against hnRNP H or hnRNP F (shH or shF). Data are presented as mean values  $\pm$  SEM of  $n=3$  independent experiments, \*\* $p < 0.005$  and \*\*\* $p < 0.0005$  (two-sided paired t-test).

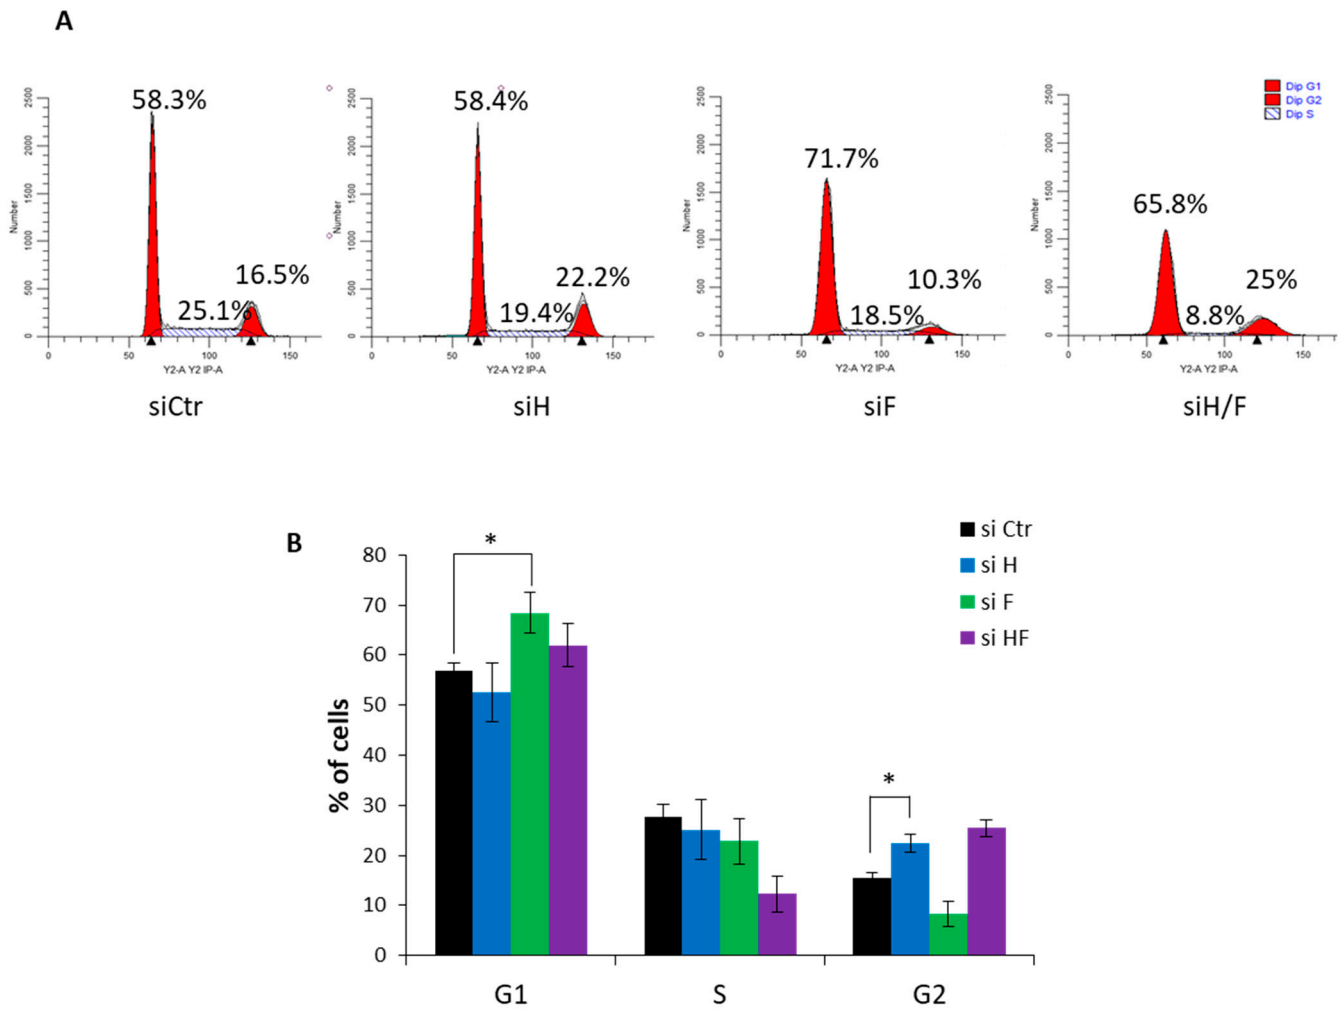

**Figure S5.** hnRNP H/F depletion induces glioblastoma cell cycle arrest. **(A)** Representative flow cytometry images after propidium iodide (PI) staining of LN18 cells treated with 2.5 nM of siRNA control (siCtr), siRNAs against hnRNP H and/or hnRNP F (siH, siF or siH/F) for 72 h. **(B)** Quantification of LN18 cell distribution in the G1, S or G2 cell cycle phases from (A). Data are presented as mean values  $\pm$  SEM of  $n=3$  for siH and siF or  $n=2$  for siH/F independent experiments,  $*p < 0.05$  (two-sided paired t-test).

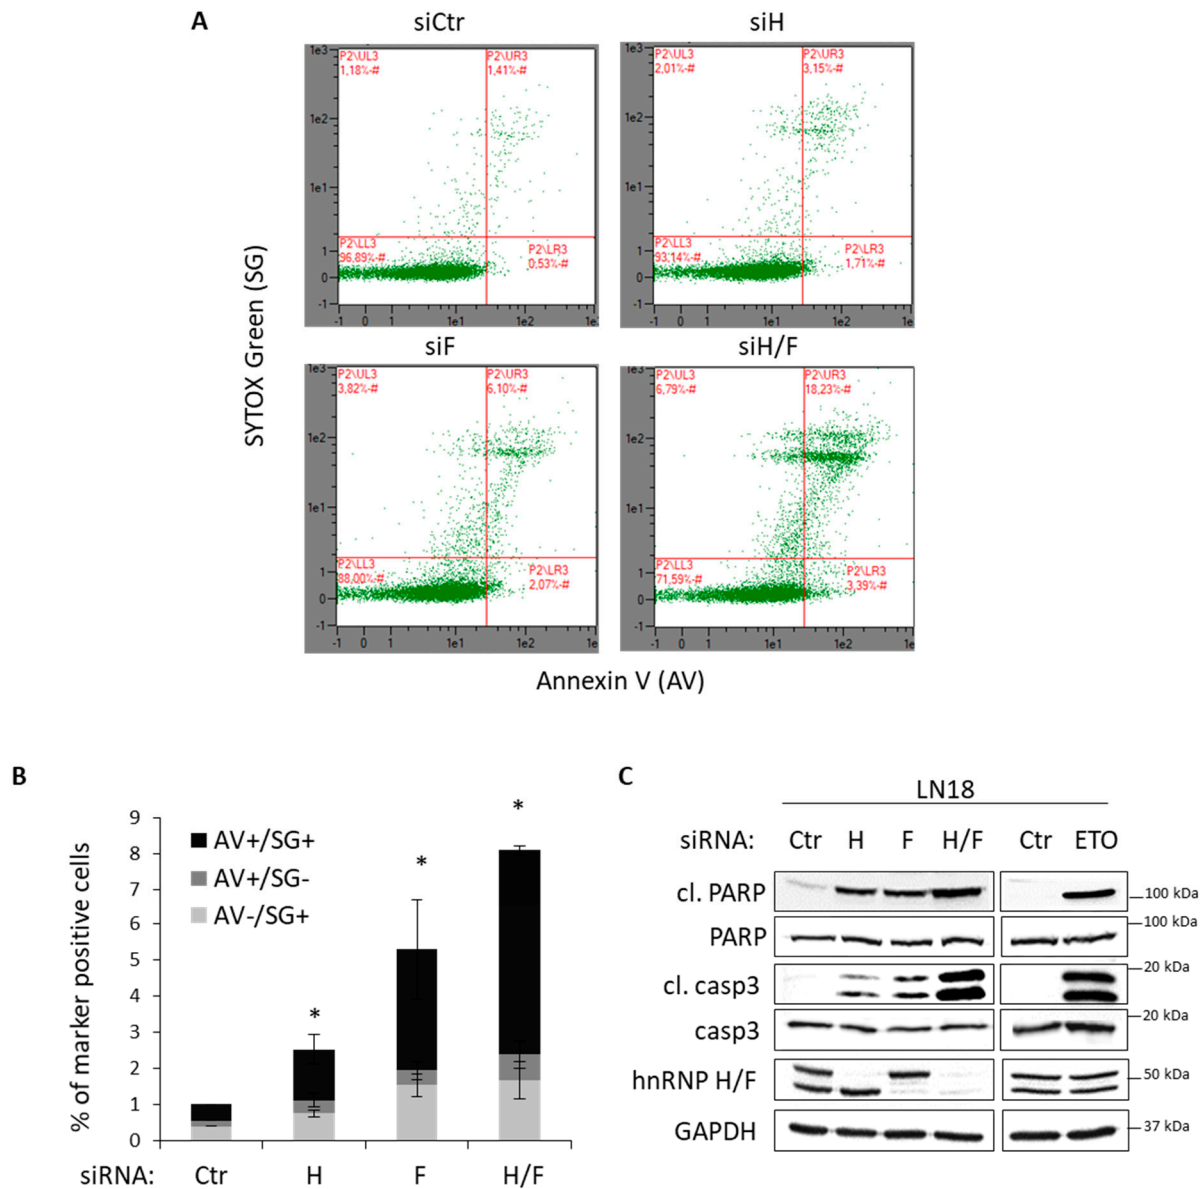

**Figure S6.** hnRNP H/F depletion increases GBM cell apoptosis. **(A)** Dot plot representing the percentage of both apoptotic and necrotic LN18 cells treated with 2.5 nM of siRNA control (siCtrl), siRNAs against hnRNP H and/or hnRNP F (siH, siF and siH/F) for 72 h and analyzed by flow cytometry and Annexin V (AV)/ SYTOX Green (SG) double staining. **(B)** Quantification of Annexin V (AV)/SYTOX Green (SG) combination positive cells from (A). Data are presented as mean values  $\pm$  SEM of  $n=3$  independent experiments,  $*p<0.05$  (two-sided paired t-test). **(C)** Western Blot analysis of cleaved PARP (cl. PARP), PARP, cleaved caspase 3 (cl. casp3) and caspase 3 (casp3) expression in LN18 cells treated with 2.5 nM of siRNA control (siCtrl), siRNAs against hnRNP H and/or hnRNP F (siH, siF and siH/F) for 72 h. Etoposide (ETO) treatment at 100  $\mu$ g/mL for 72 h constitutes a positive control.

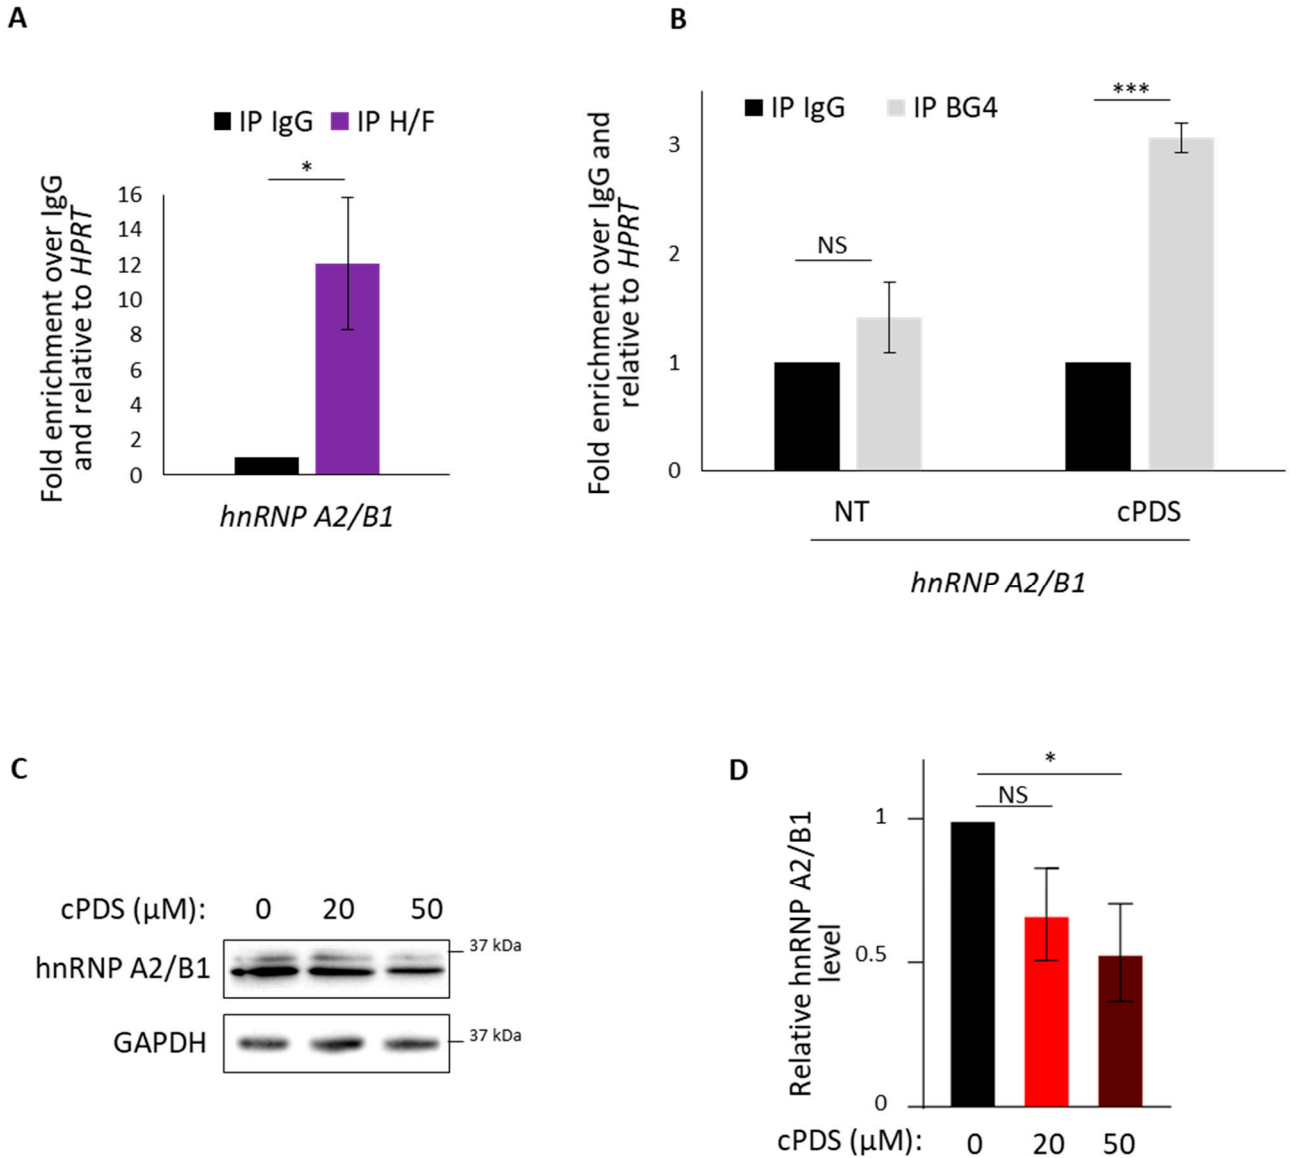

**Figure S7.** *hnRNP A2/B1* mRNA interact with hnRNP H/F, contain an RG4 and are affected by RG4-stabilization. **(A)** Immunoprecipitation of RNA-protein complexes (RIP) performed on U87 cytoplasmic cell extracts using control IgG (IP IgG) or hnRNP H/F (IP H/F) antibody, followed by RT-qPCR analysis of *hnRNP A2/B1* and *HPRT* mRNAs. Data are plotted as mean values  $\pm$  SEM of  $n = 3$  independent experiments. **(B)** Immunoprecipitation (IP) of RNA-protein complexes (RIP), using control IgG (IP IgG) or BG4 (IP BG4) antibody, performed on cytoplasmic extracts from U87 cells untreated (NT) or treated with 20  $\mu$ M carboxypyridostatin (cPDS) for 2 h, followed by RT-qPCR analysis of *hnRNP A2/B1* and *HPRT* mRNAs. Data are plotted as mean values  $\pm$  SEM of  $n = 3$  independent experiments. **(C)** Western Blot analysis of hnRNP A2/B1 expression in LN18 cells treated with dose scale of carboxypyridostatin (cPDS) for 48 h. Shown is a representative result from  $n=3$  independent experiments. **(D)** hnRNP A2/B1 protein levels in (C) were normalized to GAPDH protein levels and plotted relatively to the non-treated condition (0  $\mu$ M cPDS). For panels (A), (B) and (D), data are presented as mean values  $\pm$  SEM of  $n = 3$  independent experiments, \* $p < 0.05$ , \*\*\* $p < 0.0005$  and NS: Non-Significant (two-sided paired t-test).

**Figure S8 Original Western Blot**

Whole Western Blot for Figure 1C.

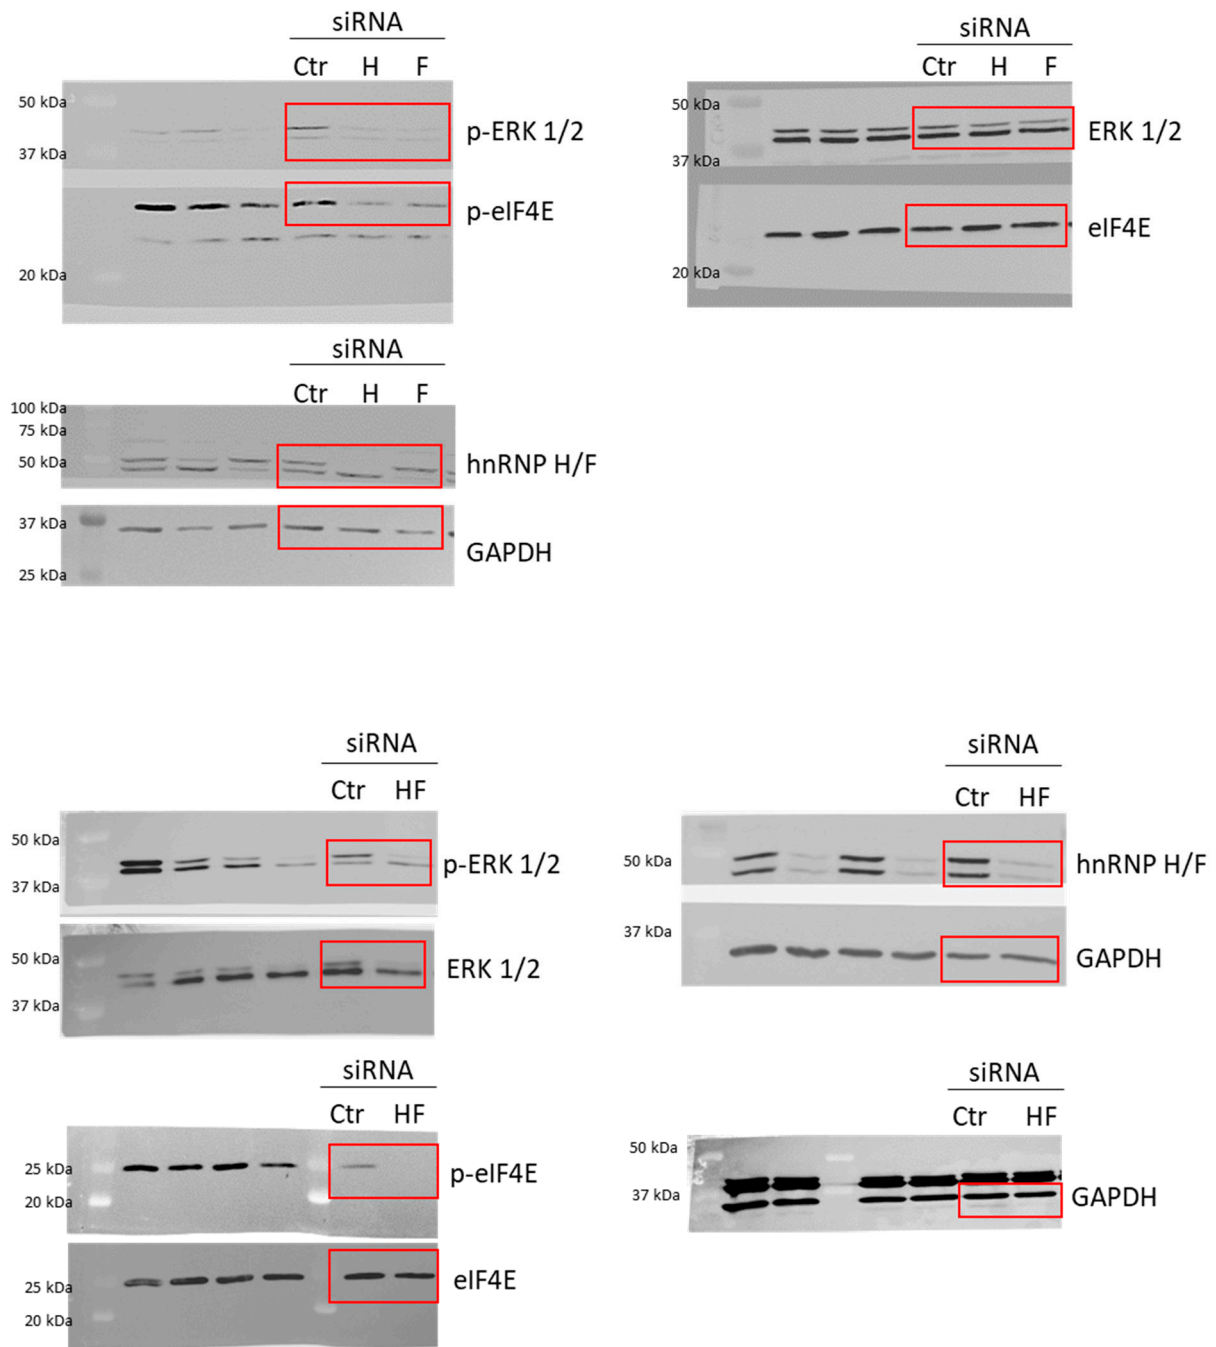

Whole Western Blot for Figure 2C.

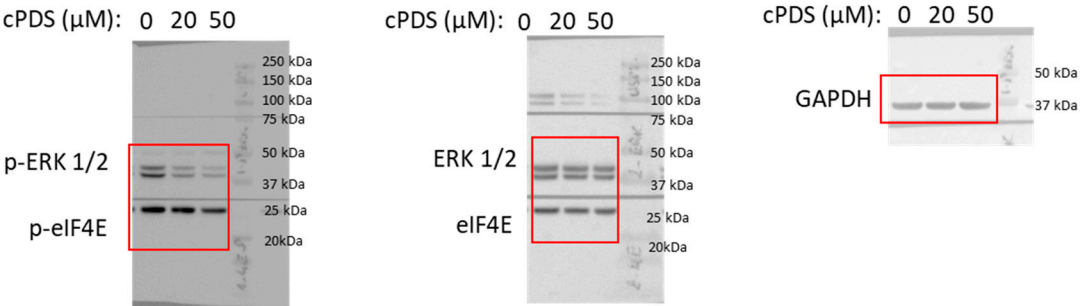

Whole Western Blot for Figure 3A.

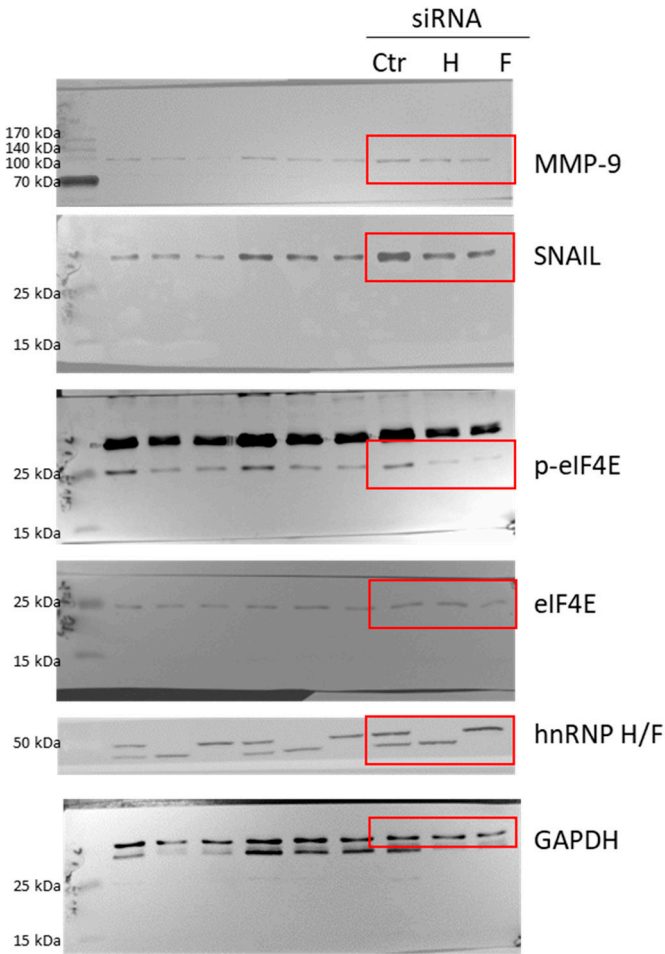



Whole Western Blot for Figure 3C.

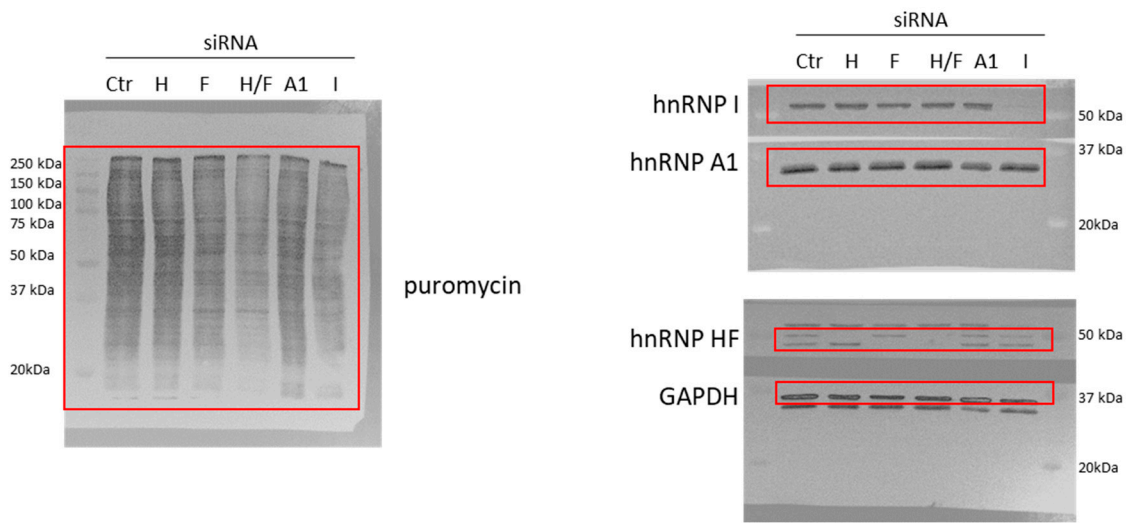

Whole Western Blot for Figure 5.

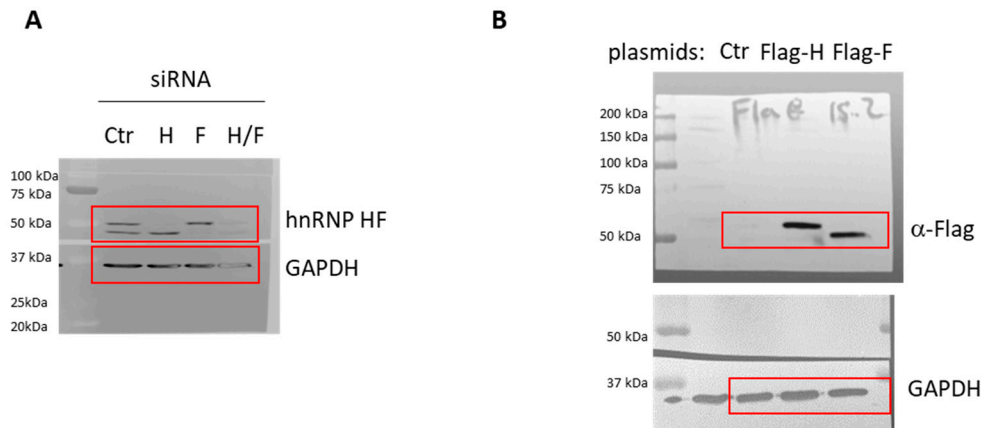

Whole Western Blot for Figure S1F

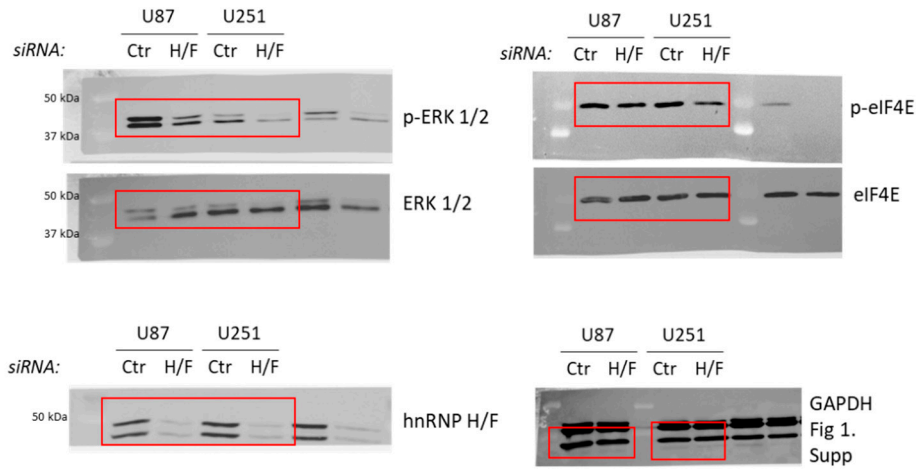

# Whole Western Blot for Figure S2

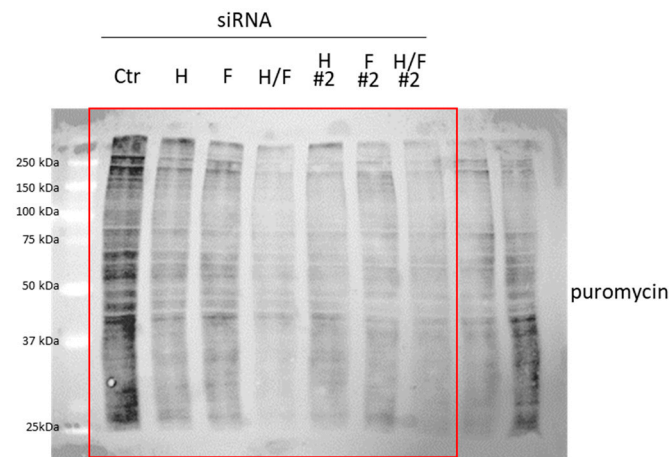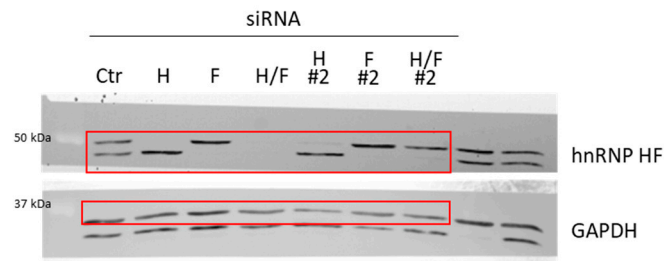

# Whole Western Blot for Figure S3

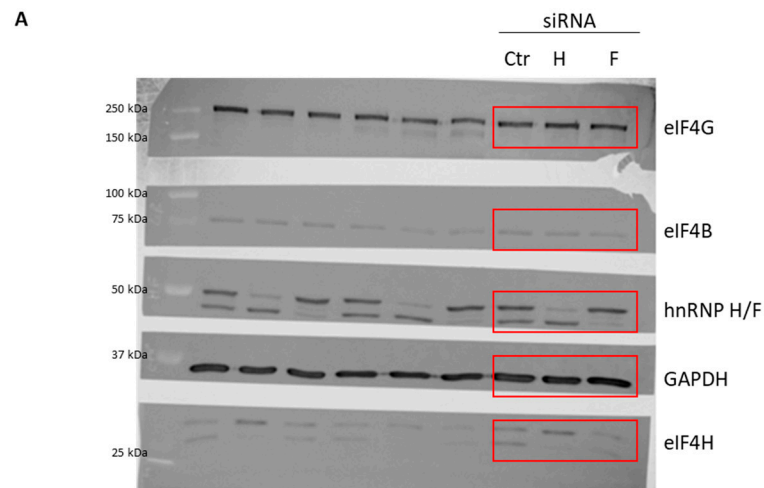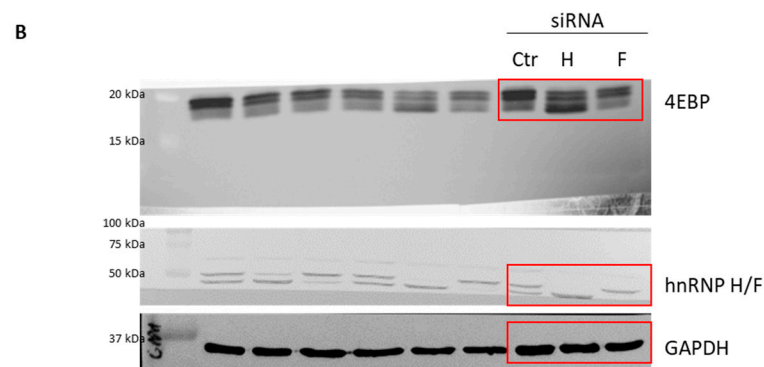

Whole Western Blot for Figure S4.

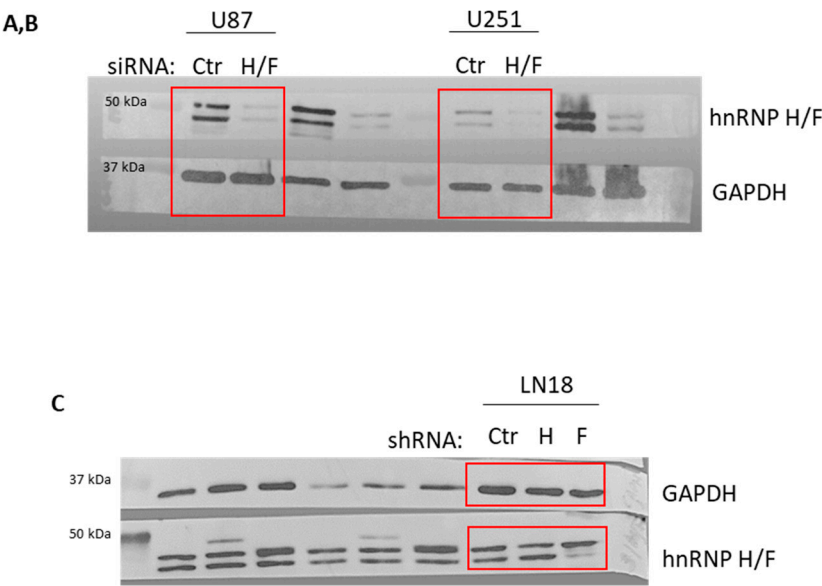

Whole Western Blot for Figure S6C

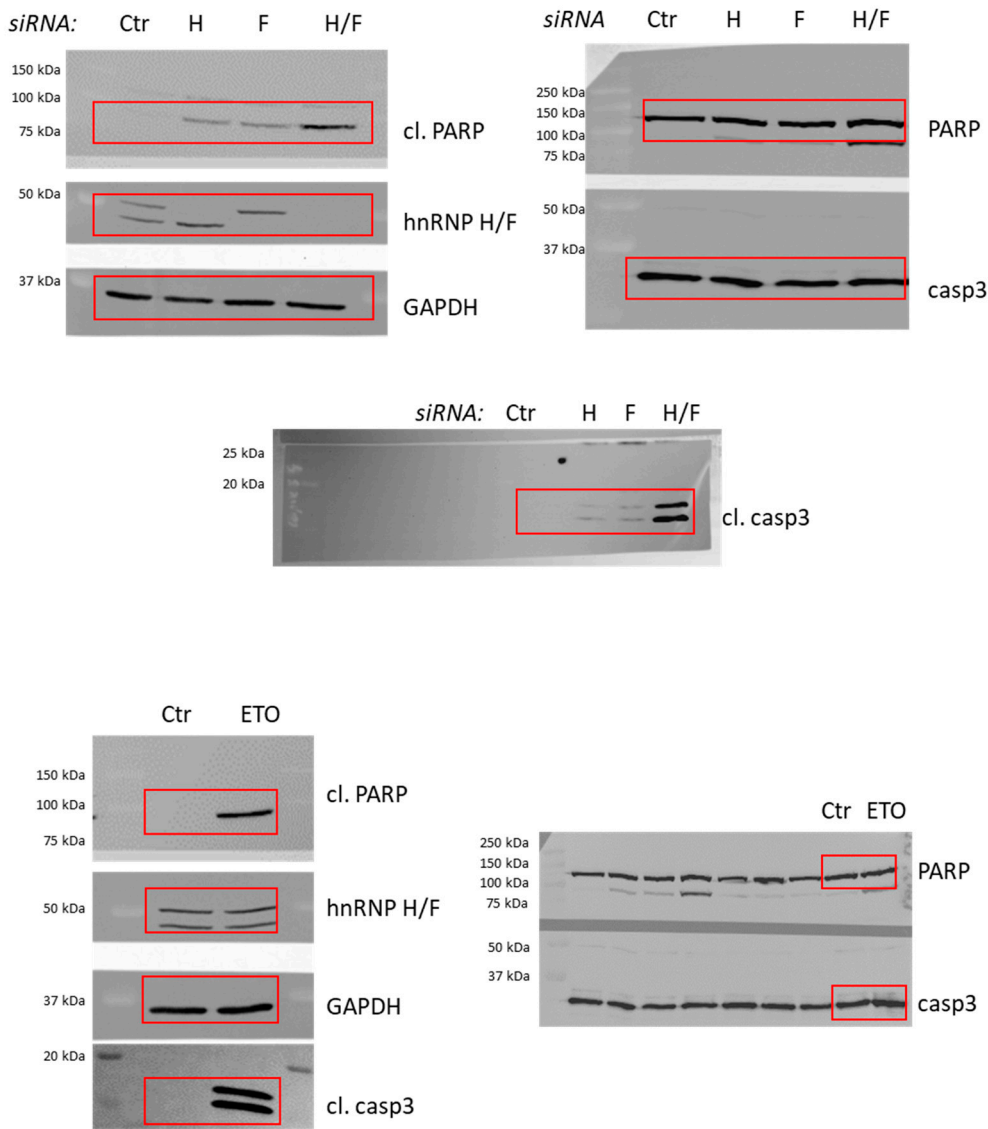

Whole Western Blot for Figure S7C

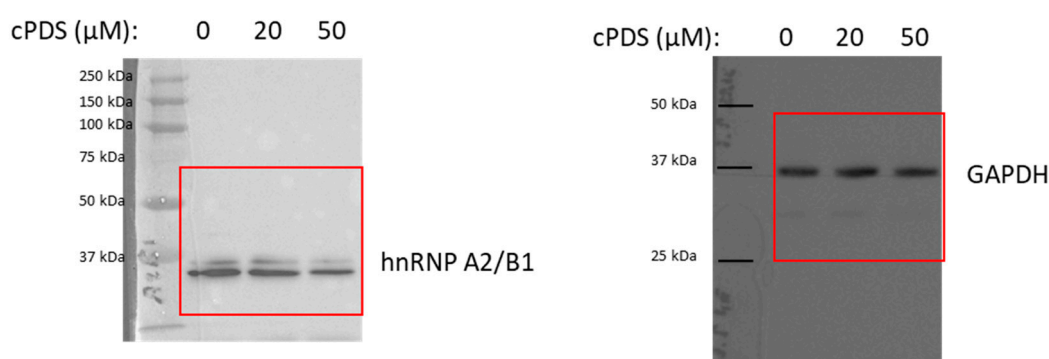

Table S1. List of siRNAs/shRNAs.

| Name      | siRNA/shRNA | Sequence                                                                                |
|-----------|-------------|-----------------------------------------------------------------------------------------|
| Control   | siRNA       | 5'-GGUCCGGCUCCCCCAAUG dTdT-3'                                                           |
| hnRNP H   | siRNA       | 5'- GGUAUUCGUUUCUUCUACA dTdT -3'                                                        |
| hnRNP F   | siRNA       | 5'- GGUGUCCAUUUCUUCUACA dTdT-3'                                                         |
| hnRNP H#2 | siRNA       | hnRNP H1: 5'- AGCGGUGGUGCUUACGAAC dTdT-3'<br>hnRNP H2: 5'- CAUGAGAGUACAUAUUGAA dTdT- 3' |
| hnRNP F#2 | siRNA       | 5'- GCGACCGAGAACGACAUUU dTdT-3'                                                         |
| hnRNP A1  | siRNA       | 5'- AAGGGAGGAAAUUUUGGAGGC dTdT -3'                                                      |
| hnRNP I   | siRNA       | 5'- AACUCCAUCAUCCAGAGAA dTdT-3'                                                         |
| hnRNP H   | shRNA       | 5'-AGCTGAAGTTAGAACTCATTA-3'                                                             |
| hnRNP F   | shRNA       | 5'-AGCGACCGAGAACGACATTTA-3'                                                             |

Table S2. List of primers used in RT-qPCR and RT-PCR.

| Primer               | Application | Sequence                  |
|----------------------|-------------|---------------------------|
| USP1_Fw              | qPCR        | ACAGTCCTTAATCATTTTCGGTTGA |
| USP1_Rv              | qPCR        | GGAGTTGGCATGTTTCTTGAATGT  |
| A-Raf short_Fw       | qPCR/PCR    | CGGTGGTGAGTCATGGAAGC      |
| A-Raf short_Rv       | qPCR/PCR    | GTATGTGCAGATGTAGGGGTCC    |
| A-Raf full length_Fw | PCR         | ATGGAGCCACCACGGGGC        |
| A-Raf full length_Rv | PCR         | CGTCTTTCGTCCCTTGATGAGTC   |
| A-Raf_Fw             | qPCR        | CAAGATGGAGACGGCGGC        |
| A-Raf_Rv             | qPCR        | ACCGTGCGTTGCTTGTTG        |
| hnRNP A2/B1_Fw       | qPCR        | TGGAGGAGGAAGAGGAGGAT      |
| hnRNP A2/B1_Rv       | qPCR        | CCATGTTTCCTGCTACCACCA     |
| HPRT_Fw              | qPCR        | TGCTTTCCTTGGTCAGGCAGT     |
| HPRT_Rv              | qPCR        | CTTCGTGGGGTCCTTTTCACC     |
| GAPDH_Fw             | qPCR        | TCACCAGGGCTGCTTTTAAC      |
| GAPDH_Rv             | qPCR        | CGAGATCCCTCCAAAATCAA      |
| hnRNP H_Fw           | PCR         | AAAATGGGGCTCAAGGTATTCTG   |
| hnRNP H_Rv           | PCR         | GCTATTTCTGTGAAGCAAAGTGC   |
| hnRNP F_Fw           | PCR         | TCCAAAGACAGGGCCAATATG     |
| hnRNP F_Rv           | PCR         | GCATCACCTGGCTGCTATAC      |
| GAPDH_Fw             | PCR         | TGTCGCTCTTGAAGTCAGAGGAGA  |
| GAPDH_Rv             | PCR         | AGAACATCATCCCTGCCTCTACTG  |
